# Supplementary material
Source: publisher figshare collection journal article supplement (https://frontiersin.figshare.com/ndownloader/files/13138826)

**Figure S2. Validation of the consensus read sequencing.** A. Comparison of CDR3 length distributions from fluorescence spectratyping (in blue) or computed from deep sequencing data (in red). Profiles show IgM profiles from the fish Vac2 (group «Vaccinated»). Similar results were observed for IgT. The corresponding primer combinations are indicated. Y axis: fluorescence arbitrary units, X axis: length of the run-off products (max and min values for each profile are given in Table S1). B. Venn diagrams showing the overlap of clonotype repertoires detected by parallel sequencing (from different runs) of replicate libraries from the same RNA preparation. Numbers of sequences shared or unique to replicates are indicated for two VH/Ccombinations, for all clonotypes ( $MID \geq 1$ ) or clonotypes found at least 5 ( $MID \geq 5$ ) or 10 ( $MID \geq 10$ ) times. C. For sequences shared between replicates, the abundances are shown as a scatterplot, for the same VHC combinations.

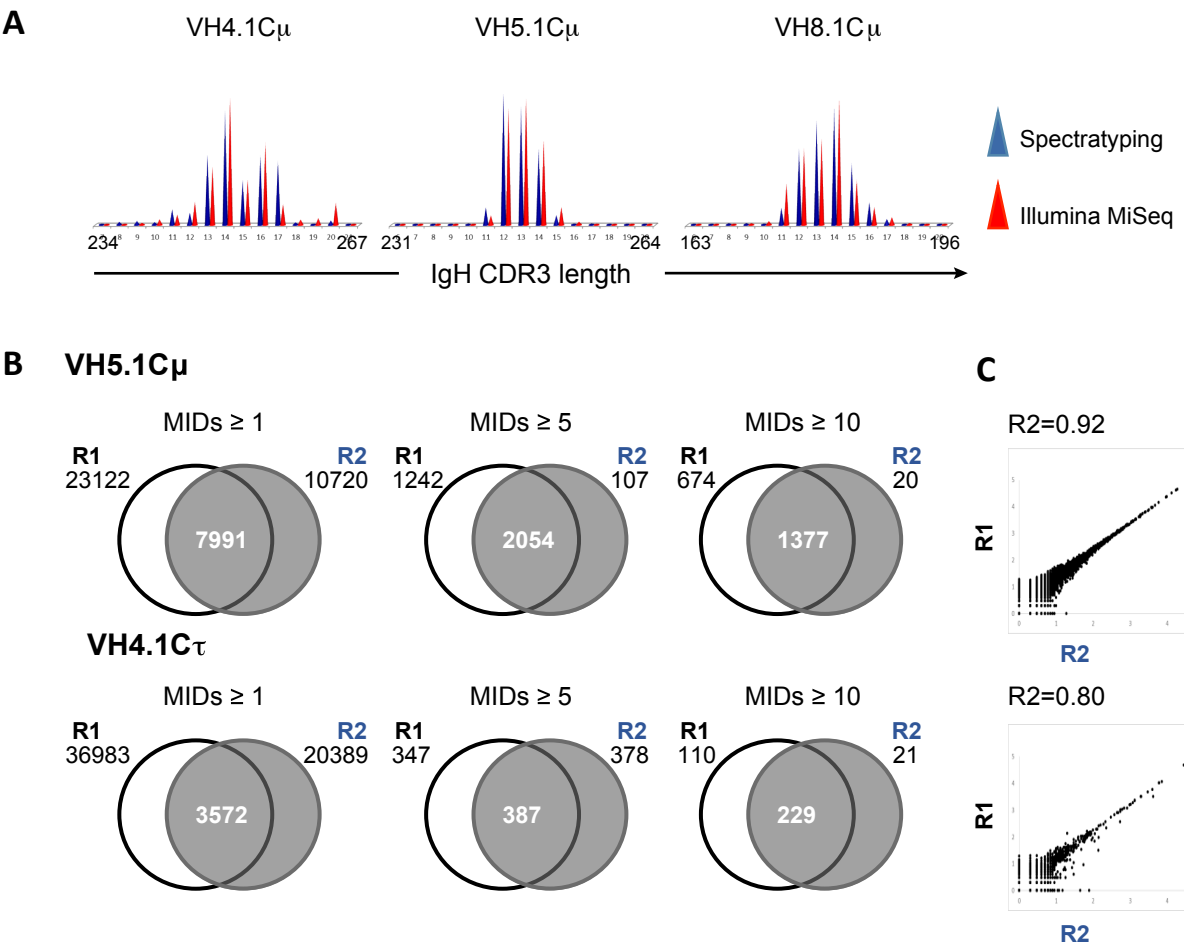

Supplement: Supplementary file [file 13138826]
